# Supplementary material
Source: Springer Nature journal article supplement (https://www.springermedizin.de/resource/supplementary/12943_2013_1168_MOESM9_ESM.pdf/9552586)
Supplement: MOESM9 [file 9552586]

Additional file 9. The 7-GeneSig classification rules

| <b>Group</b> | <b>NB-r1</b> | <b>NB-r2</b> | <b>NB-r3</b> | <b>GN-r4</b> | <b>GNB-r4</b> |
|--------------|--------------|--------------|--------------|--------------|---------------|
| ALK          | below 0.2    | -1 to 1.5    | above 0.5    | below -0.5   | -0.5 to 0.5   |
| BIRC5        | 0 to -1      | above 0      | above 0      | below 0      | below 0       |
| CCND1        | -0.4 to 1.6  | -0.4 to 1.6  | -0.4 to 1.6  | below -0.8   | below 0       |
| MYCN         | below 0.5    | below 0.5    | above 0      | below -0.5   | below 0       |
| NTRK1        | above >0.5   | 0 to 1.5     | below -0.5   | below 0.4    | below 1       |
| PHOX2B       | above -0.3   | above -0.3   | above -0.3   | below -1.5   | -1.5 to 0     |
| ERBB3        | below 1      | below 0      | below 0      | above 1      | -1 to 1       |

Rules based on standard deviations (SD) of expression values for all samples in each data set. In order to classify samples into one of the five subgroups, 5 out of 6 expression rules must be met. Shaded cells indicate rules with no exception for classification into that specific subgroup.
